# Supplementary material for: Human esophageal myofibroblasts increase squamous epithelial thickness via paracrine mechanisms in an in vitro model of gastroesophageal reflux disease
Source: PLoS One. 2020 Sep 14;15(9):e0238852. doi: 10.1371/journal.pone.0238852 (PMC7489504; doi:10.1371/journal.pone.0238852)
Supplement: S5 File — (XLSX) [file pone.0238852.s005.xlsx]

## Sheet: panel A
User: USER			Path: C:\Program Files\BMG\Omega\User\Data\							Test ID: 11326
Test Name: QUICK FI BOTTOM								Date: 9/7/2018		Time: 12:01:20 PM
ID1: Mouse-090618
Fluorescence (FI)
	diluted			read 1h
	Raw Data (544, 590)													bg	SFMM
	1	2	3	4	5	6	7	8	9	10	11	12		1	2	3	4	5	6	7	8	9	10	11	12
A	74468	79394	92041	94273	84307	89674	87058	86591	87664	86887	94613	97688		73624.7	5770	18417	20649	10683	16050	13434	12967	14040	13263	20989	24064
B	74712	74375	92835	97791	96707	92884	78210	80861	79016	79033	95455	138626			751	19211	24167	23083	19260	4586	7237	5392	5409	21831	65002
C	71136	79385	84576	112327	78675	78408	81149	75868	77130	76099	74768	93939			5761	10952	38703	5051	4784	7525	2244	3506	2475	1144	20315
D	70930	82266	82875	109407	78972	78853	78881	76079	75644	75573	77032	207736			8642	9251	35783	5348	5229	5257	2455	2020	1949	3408	134112
E	70266	79424	94571	84262	79749	82578	81615	77929	78648	76907	79633	1226			5800	20947	10638	6125	8954	7991	4305	5024	3283	6009	-72398
F	80236	77852	83146	80218	76878	80364	83213	81292	78524	78462	75536	1183			4228	9522	6594	3254	6740	9589	7668	4900	4838	1912	-72441
G	1646	82238	76482	77671	77898	75969	76111	75250	71511	83910	74073	1458			8614	2858	4047	4274	2345	2487	1626	-2113	10286	449	-72166
H	1682	76926	79530	69582	78980	76374	76507	79126	72322	90685	73122	1424			3302	5906	-4042	5356	2750	2883	5502	-1302	17061	-502	-72200
				read 3h
User: USER			Path: C:\Program Files\BMG\Omega\User\Data\							Test ID: 11328
Test Name: QUICK FI BOTTOM								Date: 9/7/2018		Time: 2:14:43 PM
ID1: Mouse-090618
Fluorescence (FI)
	Raw Data (544, 590)													bg	SFMM
	1	2	3	4	5	6	7	8	9	10	11	12		1	2	3	4	5	6	7	8	9	10	11	12
A	41114	53402	74263	78662	75776	79489	70800	67794	70441	70787	73350	54360		40328.8	13074	33935	38334	35448	39161	30472	27466	30113	30459	33022	14032
B	40822	50433	77900	85293	84774	78884	54359	57237	54792	57813	75292	119780			10105	37572	44965	44446	38556	14031	16909	14464	17485	34964	79452
C	38755	50081	62289	74504	52963	53338	58209	47946	54364	52281	49074	51906			9753	21961	34176	12635	13010	17881	7618	14036	11953	8746	11578
D	39134	54504	55015	68701	53170	54025	53397	49553	48991	51507	54552	208666			14176	14687	28373	12842	13697	13069	9225	8663	11179	14224	168338
E	38464	53350	76976	61000	54897	59930	58099	53881	55645	53024	58109	714			13022	36648	20672	14569	19602	17771	13553	15317	12696	17781	-39614
F	43684	48949	59368	56815	49327	56384	62723	59480	54183	56226	50241	676			8621	19040	16487	8999	16056	22395	19152	13855	15898	9913	-39652
G	886	56725	50009	54322	51118	50792	49767	49036	44534	60864	48408	772			16397	9681	13994	10790	10464	9439	8708	4206	20536	8080	-39556
H	879	48271	54819	46587	52927	51068	51458	41712	44894	60067	47529	770			7943	14491	6259	12599	10740	11130	1384	4566	19739	7201	-39558
				read 5h
User: USER			Path: C:\Program Files\BMG\Omega\User\Data\							Test ID: 11329
Test Name: QUICK FI BOTTOM								Date: 9/7/2018		Time: 4:32:33 PM
ID1: Mouse-090618
Fluorescence (FI)
	Raw Data (544, 590)													bg	SFMM
	1	2	3	4	5	6	7	8	9	10	11	12		1	2	3	4	5	6	7	8	9	10	11	12
A	29318	40318	79834	83733	79328	60285	64068	60382	64211	64776	60099	37683		28916	11402	50918	54817	50412	31369	35152	31466	35295	35860	31183	8767
B	29146	42420	71978	80700	80376	51924	44279	47959	45304	49356	53424	112081			13504	43062	51784	51460	23008	15363	19043	16388	20440	24508	83165
C	28190	39870	53973	60608	52855	43417	48742	37751	44563	42550	39133	36413			10954	25057	31692	23939	14501	19826	8835	15647	13634	10217	7497
D	28035	42635	44648	53314	42875	44393	43093	38623	38816	41329	45944	206892			13719	15732	24398	13959	15477	14177	9707	9900	12413	17028	177976
E	27538	42079	59784	57438	54626	49849	48462	49605	45438	43283	48547	480			13163	30868	28522	25710	20933	19546	20689	16522	14367	19631	-28436
F	31269	38593	51114	47461	48896	47592	48049	45649	44680	47282	40220	446			9677	22198	18545	19980	18676	19133	16733	15764	18366	11304	-28470
G	581	41036	40114	45554	41777	40829	40169	39528	34299	52488	39058	525			12120	11198	16638	12861	11913	11253	10612	5383	23572	10142	-28391
H	582	38429	40335	38446	43702	42554	42394	41339	35243	48800	37894	534			9513	11419	9530	14786	13638	13478	12423	6327	19884	8978	-28382
		SFMM

## Sheet: panel B
														STR growth with CM0515
														2019-05-23	STR p	2k/well/100ul	O.N.
User: USER			Path: C:\Program Files\BMG\Omega\User\Data\							Test ID: 12202				2019-05-24	Add CM( 1:2 dilu in KSFM)
Test Name: QUICK LUM TOP								Date: 5/28/2019		Time: 2:48:58 PM				2019-05-28	day4 CTG
ID1: 52419p															remov media, add 50ul media
Luminescence															add 50ul CTG reagent, shakeing for 11 min.
															read Lum.
																			#3	#5	#6	#7
	Raw Data (590)																C -SFMM	C-ph4.5	C- Bile, pH4.5	SFMM	SFMM	KSFM
	1	2	3	4	5	6	7	8	9	10	11	12				1	2	3	4	5	6	7	8	9	10	11	12
A	1	0	0	0	0	0	0	0	2	0	0	0			A		CM-1	CM-2	CM-3	CM-5	CM-6	CM-7					cell in assay day
B	23226	7698	6967	6919	4332	3736	4967	0	2	0	7	0			B	1;2 dilu	CM1/2, KSFM 1/2
C	15837	7326	6809	4751	2920	2240	4426	2	3	0	0	0			C
D	7466	7303	6353	4603	3847	1854	5411	5	0	4	0	0			D
E	4859	7119	6229	3768	3169	3259	4716	0	7	0	0	6			E	1:4 dilu	CM1/4, KSFM 1/2, KSFM-w/o sup 1/4
F	3015	7477	9602	6043	5308	3771	4616	2	0	0	2	0			F
G	1192	8418	11026	5278	5932	4573	4289	0	0	0	0	0			G
H	0	7	1	0	10	7	0	0	0	5	0	0			H
